# Supplementary material
Source: PubMed Central journal article supplement (PMC2667344)
Supplement: M800450-MCP200_1.pdf [file M800450-MCP200_1.pdf]

## Supplementary Materials:

### Part S1. The influence of different $k_+$ values on predictions

The dataset we used to train the SVM classifiers was quite unbalanced: the ratio of binders versus non-binders was 1:20. When using penalty parameters, the objective function of SVM becomes:

$$\begin{aligned} \min_{w,b,\xi} \quad & \frac{1}{2} w^T w + C_+ \sum_{y_i=1} \xi_i + C_- \sum_{y_i=-1} \xi_i \\ \text{subject to} \quad & y_i (w^T \phi(x_i) + b) \geq 1 - \xi_i, \\ & \xi_i \geq 0, i = 1, \dots, l. \end{aligned} \tag{1}$$

where  $C_+ = k_+ C$  and  $C_- = k_- C$  are the penalty parameters of error terms for the positive and the negative class, respectively;  $k_+$  and  $k_-$  are the weight parameters for the positive and the negative class, respectively;  $C > 0$  is a constant that represents the upper boundary of the penalty parameters.

In this study, we set a higher weight to the binder class ( $k_+$ ) while keeping  $k_-$  to 1. Because different values of  $k_+$  and  $k_-$  would affect the classification sensitivity and specificity of the SVM, we plotted a receiver operating characteristic (ROC) curve by varying  $k_+$  (Figure S3). The area under the curve in the ROC plot represents of the performance of the model and our model achieved a value of 0.948. To determine the value of  $k_+$  that would achieve balanced sensitivity ( $SE$ ), prediction accuracy for binders ( $Q_+$ ) and Matthews correlation coefficient ( $C$ ), we analyzed how these classification criteria changed with the value of  $k_+$  (Figure S4 and S5 in the supplementary materials). The value of  $k_+$  is decided by the user: higher value of  $k_+$  gives higher  $SE$  but lower  $Q_+$  and  $C$ ; lower of  $k_+$  gives lower  $SE$  but higher  $Q_+$  and  $C$ . Figure S4 and S5 suggest that  $k_+ = 4$  may be a balanced value.

Table S1. The number of binders and non-binders included in the data set for training the MIEC-SVM classifier

|              | Binder     | Non-binder  |
|--------------|------------|-------------|
| Abl_human    | 31         | 620         |
| Boi1_yeast   | 25         | 500         |
| c-Src_human  | 61         | 1220        |
| Fyn_human    | 27         | 540         |
| Grb2_mouse   | 19         | 380         |
| Itk_human    | 5          | 100         |
| Lsb3_yeast   | 25         | 500         |
| Lyn_human    | 28         | 560         |
| Myo3_yeast   | 6          | 120         |
| Myo5_yeast   | 52         | 1040        |
| Nbp2_human   | 25         | 500         |
| P85a_human   | 29         | 580         |
| Rvs167_yeast | 19         | 380         |
| Sla1_yeast   | 30         | 600         |
| Spta2_human  | 20         | 400         |
| Yes_human    | 29         | 580         |
| Yha2_yeast   | 40         | 800         |
| Ysc84_yeast  | 20         | 400         |
| <b>Total</b> | <b>491</b> | <b>9820</b> |

Table S2. The definition of the interaction pairs for the Abl SH3 domain for calculating MIECs

| Peptide residue   | SH3 residue                                                                 |
|-------------------|-----------------------------------------------------------------------------|
| Ala <sub>-6</sub> | Gly13, Asp14, Asn15, Thr16, Asn31, His32, Asn33, Trp36, Glu38, Trp47        |
| Pro <sub>-5</sub> | Gly13, Asp14, Asn15, Thr16, Asn31, His32, Asn33, Gly34, Trp36, Glu38, Trp47 |
| Ser <sub>-4</sub> | Ser12, Gly13, Asp14, Asn15, Thr16, His32, Asn33, 00, Gly34, Trp36, Trp47    |
| Tyr <sub>-3</sub> | Phe9, Val10, Ala11, Ser12, Gly13, Asp14, Asn15, Thr16, Glu35, Trp36, Trp47  |
| Ser <sub>-2</sub> | Ser12, Asn33, 00, 00, Gly34, Glu35, Trp36, Trp47                            |
| Pro <sub>-1</sub> | Gly34, Glu35, Trp36, Pro49, Ser50, Asn51, Tyr52                             |
| Pro <sub>0</sub>  | Phe9, Trp36, Pro49, Asn51, Tyr52                                            |
| Pro <sub>1</sub>  | Tyr7, Asp8, Asn51, Tyr52                                                    |
| Pro <sub>2</sub>  | Leu6, Tyr7, Asn51, Tyr52                                                    |
| Pro <sub>3</sub>  | Tyr7, Asp8, Asn51, Tyr52                                                    |

Table S3. The performance of the SVM classifiers using various kernel functions and various combinations of domain-peptide MIECs

| Model | MIECs*                                          | Kernel function | $SE_{train}$<br>(%) | $SP_{train}$<br>(%) | $SE_{test}$<br>(%) | $SP_{test}$<br>(%) | $Q_+$<br>(%) | $Q_-$<br>(%) | $C$   |
|-------|-------------------------------------------------|-----------------|---------------------|---------------------|--------------------|--------------------|--------------|--------------|-------|
| 1     | $\Delta E_{vdw}, \Delta E_{ele}$                | Linear          | 87.5                | 88.2                | 76.9               | 87.4               | 23.4         | 98.7         | 0.377 |
|       |                                                 | Polynomial      | 65.0                | 85.4                | 62.4               | 85.2               | 17.4         | 97.8         | 0.269 |
|       |                                                 | RBF             | 80.4                | 88.8                | 74.9               | 88.3               | 24.3         | 98.6         | 0.381 |
|       |                                                 | Sigmoid         | 71.3                | 86.9                | 67.3               | 86.7               | 20.3         | 98.1         | 0.316 |
| 2     | $\Delta E_{vdw}, \Delta G_{polar}$              | Linear          | 89.9                | 88.3                | 79.5               | 87.6               | 24.3         | 98.8         | 0.394 |
|       |                                                 | Polynomial      | 69.8                | 87.4                | 66.2               | 87.3               | 20.7         | 98.1         | 0.317 |
|       |                                                 | RBF             | 71.1                | 88.1                | 67.5               | 87.8               | 21.8         | 98.2         | 0.333 |
|       |                                                 | Sigmoid         | 66.3                | 85.4                | 63.8               | 85.4               | 17.9         | 97.9         | 0.279 |
| 3     | $\Delta E_{vdw}, \Delta E_{ele}, \Delta G_{GB}$ | Linear          | 89.2                | 89.1                | 77.5               | 88.2               | 24.8         | 98.7         | 0.393 |
|       |                                                 | Polynomial      | 48.6                | 87.5                | 46.5               | 87.3               | 15.5         | 97.0         | 0.206 |
|       |                                                 | RBF             | 79.1                | 88.6                | 74.1               | 88.2               | 24.0         | 98.5         | 0.374 |
|       |                                                 | Sigmoid         | 72.4                | 86.8                | 69.0               | 86.5               | 20.4         | 98.2         | 0.322 |

\* $\Delta E_{vdw}$ ,  $\Delta E_{ele}$ , and  $\Delta G_{GB}$  are van der Waals, electrostatic and polar contribution to desolvation, respectively.

$$\Delta G_{polar} = \Delta E_{ele} + \Delta G_{GB}$$

Table S4. Distinct distributions of the binding free energies calculated by MM/GBSA and MM/PBSA for binders and non-binders.

| No. | Domains      | <i>p-value</i> *     |                      |
|-----|--------------|----------------------|----------------------|
|     |              | MM/GBSA              | MM/PBSA              |
| 1   | Abl_human    | 2.77e <sup>-8</sup>  | 8.15e <sup>-12</sup> |
| 2   | Boi1_yeast   | 1.75e <sup>-6</sup>  | 0.0050               |
| 3   | c-Src_human  | 1.27e <sup>-9</sup>  | 7.71e <sup>-8</sup>  |
| 4   | Fyn_human    | 8.16e <sup>-5</sup>  | 1.95e <sup>-4</sup>  |
| 5   | Grb2_mouse   | 1.09e <sup>-9</sup>  | 8.16e <sup>-4</sup>  |
| 6   | Lsb3_yeast   | 1.52e <sup>-8</sup>  | 3.12e <sup>-5</sup>  |
| 7   | Lyn_human    | 4.67e <sup>-22</sup> | 0.0023               |
| 8   | Myo5_yeast   | 0.55                 | 5.37e <sup>-4</sup>  |
| 9   | Nbp2_human   | 5.76e <sup>-11</sup> | 3.96e <sup>-10</sup> |
| 10  | P85a_human   | 6.32e <sup>-23</sup> | 1.24e <sup>-9</sup>  |
| 11  | Rvs167_yeast | 8.36e <sup>-13</sup> | 1.03e <sup>-12</sup> |
| 12  | Sla1_yeast   | 7.29e <sup>-8</sup>  | 3.92e <sup>-5</sup>  |
| 13  | Spta2_human  | 5.82e <sup>-4</sup>  | 0.010                |
| 14  | Yes_human    | 5.56e <sup>-12</sup> | 9.04e <sup>-7</sup>  |
| 15  | Yha2_yeast   | 4.24e <sup>-22</sup> | 7.63e <sup>-19</sup> |
| 16  | Ysc84_yeast  | 6.73e <sup>-10</sup> | 2.40e <sup>-5</sup>  |

\* P-value was calculated by Student's *t*-test. Two domains, Itk and Myo3, were not included in the calculation because they only had a small number of known binders (5 and 6, respectively).

Table S5. The classification accuracies of SVMs trained on the total binding free energies calculated by MM/GBSA.

| No. | Domains      | <i>SE</i><br>(%) | <i>n</i> + | <i>N</i> + | <i>SP</i><br>(%) | <i>n</i> - | <i>N</i> - | <i>Q</i> <sub>+</sub><br>(%) | <i>Q</i> <sub>-</sub><br>(%) |
|-----|--------------|------------------|------------|------------|------------------|------------|------------|------------------------------|------------------------------|
| 1   | Abl_human    | 90.3             | 28         | 31         | 75.3             | 467        | 620        | 15.5                         | 99.4                         |
| 2   | Boi1_yeast   | 56.0             | 14         | 25         | 83.4             | 417        | 500        | 14.4                         | 97.4                         |
| 3   | c-Src_human  | 44.3             | 27         | 61         | 87.0             | 1062       | 1220       | 14.6                         | 96.9                         |
| 4   | Fyn_human    | 92.6             | 25         | 27         | 79.9             | 383        | 540        | 13.7                         | 99.5                         |
| 5   | Grb2_mouse   | 63.2             | 12         | 19         | 79.7             | 303        | 380        | 13.5                         | 97.7                         |
| 6   | Lsb3_yeast   | 76.0             | 19         | 25         | 78.8             | 473        | 600        | 13.0                         | 98.7                         |
| 7   | Lyn_human    | 92.9             | 26         | 28         | 86.6             | 485        | 560        | 25.7                         | 99.6                         |
| 8   | Myo5_yeast   | 82.7             | 43         | 52         | 21.1             | 219        | 1040       | 4.98                         | 96.1                         |
| 9   | Nbp2_human   | 96.0             | 24         | 25         | 74.6             | 373        | 500        | 15.9                         | 99.7                         |
| 10  | P85a_human   | 93.1             | 27         | 29         | 88.6             | 514        | 580        | 29.0                         | 99.6                         |
| 11  | Rvs167_yeast | 15.8             | 3          | 19         | 93.2             | 354        | 380        | 10.3                         | 95.7                         |
| 12  | Sla1_yeast   | 96.7             | 29         | 30         | 79.0             | 474        | 600        | 18.7                         | 99.8                         |
| 13  | Spta2_human  | 46.7             | 10         | 20         | 87.7             | 367        | 400        | 23.3                         | 97.3                         |
| 14  | Yes_human    | 82.8             | 24         | 29         | 81.0             | 470        | 580        | 17.9                         | 98.9                         |
| 15  | Yha2_yeast   | 75.0             | 30         | 40         | 84.9             | 679        | 800        | 19.9                         | 98.5                         |
| 16  | Ysc84_yeast  | 90.0             | 18         | 20         | 80.3             | 321        | 400        | 18.6                         | 99.4                         |
|     | Total        | 74.8             | 359        | 480        | 75.9             | 7361       | 9700       | 13.3                         | 98.4                         |

Table S6. Comparison of MIEC-SVM and SH3-hunter on predicting the interactions between twenty peptides and four SH3 domains. These 20 peptides were not included in the training set of MIEC-SVM. It is not clear to us whether they were included in the training set of SH3-hunter.

| No. | Peptides   | Src |              |                | Yes |              |                | Abl |              |                | Grb2 |              |                |
|-----|------------|-----|--------------|----------------|-----|--------------|----------------|-----|--------------|----------------|------|--------------|----------------|
|     |            | Exp | MIEC<br>-SVM | SH3-<br>hunter | Exp | MIEC<br>-SVM | SH3-<br>hunter | Exp | MIEC<br>-SVM | SH3-<br>hunter | Exp  | MIEC<br>-SVM | SH3-<br>hunter |
| 1   | LASRPLPLLP | ✓   | ✓            | ✓              | ✓   | ✓            | ✓              | ×   | ×            | ✓              | ×    | ×            | ×              |
| 2   | ISQRALPPLP | ✓   | ✓            | ✓              | ✓   | ×            | ✓              | ×   | ×            | ✓              | ×    | ×            | ×              |
| 3   | ITMRPLPALP | ✓   | ✓            | ✓              | ✓   | ✓            | ✓              | ×   | ×            | ✓              | ✓    | ✓            | ✓              |
| 4   | RSGRPLPPIP | ✓   | ✓            | ✓              | ✓   | ✓            | ✓              | ×   | ×            | ✓              | ×    | ✓            | ×              |
| 5   | PPWWAPPPIP | ×   | ×            | ✓              | ×   | ✓            | ✓              | ✓   | ✓            | ✓              | ×    | ✓            | ×              |
| 6   | APTYPPPPPP | ×   | ×            | ×              | ×   | ×            | ✓              | ✓   | ✓            | ✓              | ×    | ✓            | ×              |
| 7   | LTPQSKPPLP | ×   | ×            | ×              | ×   | ×            | ×              | ×   | ×            | ×              | ×    | ×            | ×              |
| 8   | LGEFSKPPIP | ×   | ×            | ×              | ×   | ×            | ×              | ×   | ×            | ×              | ×    | ×            | ×              |
| 9   | SSAPQRPLP  | ×   | ×            | ×              | ×   | ×            | ×              | ×   | ×            | ×              | ×    | ×            | ×              |
| 10  | VVPLGRPEIP | ×   | ×            | ×              | ×   | ×            | ×              | ×   | ×            | ×              | ×    | ×            | ×              |
| 11  | MPPPVPPRPP | ✓   | ×            | ×              | ×   | ×            | ✓              | ×   | ×            | ✓              | ×    | ×            | ✓              |
| 12  | VPPLVAPRPP | ×   | ×            | ×              | ×   | ×            | ×              | ×   | ×            | ×              | ×    | ×            | ×              |
| 13  | GQPAGDPDPP | ×   | ×            | ×              | ×   | ×            | ×              | ×   | ×            | ×              | ×    | ×            | ×              |
| 14  | ATSEGLPILP | ×   | ×            | ×              | ×   | ×            | ×              | ×   | ×            | ×              | ×    | ×            | ×              |
| 15  | KWDSLLPALP | ✓   | ×            | ×              | ✓   | ×            | ×              | ×   | ×            | ×              | ✓    | ×            | ×              |
| 16  | YWDMPLPRLP | ✓   | ✓            | ×              | ×   | ×            | ×              | ×   | ×            | ×              | ✓    | ✓            | ×              |
| 17  | YYQRPLPPLP | ✓   | ✓            | ×              | ✓   | ✓            | ×              | ×   | ×            | ×              | ✓    | ✓            | ×              |
| 18  | YFSRALPGLP | ✓   | ×            | ✓              | ✓   | ×            | ✓              | ×   | ×            | ✓              | ✓    | ×            | ×              |
| 19  | SLWDPLPPIP | ✓   | ✓            | ×              | ✓   | ✓            | ×              | ×   | ×            | ×              | ✓    | ✓            | ×              |
| 20  | DPYDALPETP | ✓   | ×            | ×              | ✓   | ×            | ×              | ×   | ×            | ×              | ✓    | ×            | ×              |
|     | Accuracy   |     | 16           | 13             |     | 15           | 13             |     | 20           | 14             |      | 14           | 11             |

Table S7. The 210 peptides tested in the peptide array experiment<sup>a</sup>

| No. | Peptide     | Prediction | Experiments |
|-----|-------------|------------|-------------|
| 1   | PPKFSPPPPP  | √          | √           |
| 2   | PPHWAPPAPP  | √          | √           |
| 3   | PPTWTTPKPP  | ×          | √           |
| 4   | KPTYPPPPPP  | √          | √           |
| 5   | GPRWSPPPVP  | √          | √           |
| 6   | GPRFPVPPVP  | √          | √           |
| 7   | APKKPAPPVP  | √          | ×           |
| 8   | APTMPPLPP   | √          | √           |
| 9   | PPPYPPPPVP  | √          | √           |
| 10  | PPPYPPPDIP  | √          | √           |
| 11  | AAAMQKPSLP  | ×          | ×           |
| 12  | AAMFQAPKTP  | ×          | ×           |
| 13  | AFSFPHPINP  | ×          | ×           |
| 14  | AGLMLTPTGP  | ×          | ×           |
| 15  | AIWYTLPILP  | ×          | ×           |
| 16  | AKRYVVPGHP  | ×          | ×           |
| 17  | ALSMFAPLLP  | ×          | ×           |
| 18  | ALWWFIPESP  | ×          | ×           |
| 19  | ASQMLRPFAP  | ×          | ×           |
| 20  | CEAFLKPWAP  | ×          | ×           |
| 21  | DDFWPNPKFP  | ×          | ×           |
| 22  | DDIMMSPHSP  | ×          | ×           |
| 23  | DEAFKNPTKP  | ×          | ×           |
| 24  | DGMMLGPKYP  | ×          | ×           |
| 25  | DNGWIHPLDP  | ×          | ×           |
| 26  | DNYYGTPKPP  | ×          | ×           |
| 27  | DQGYDPDPPNP | √          | ×           |
| 28  | DVFMGPPGSP  | ×          | ×           |
| 29  | ECLFSPTRP   | ×          | ×           |
| 30  | EDDFLEPATP  | ×          | ×           |
| 31  | EGNFRTPMLP  | ×          | ×           |
| 32  | EILWSAPLGP  | ×          | ×           |
| 33  | EWKYLKPRTP  | ×          | ×           |
| 34  | FALMGSPKPP  | ×          | ×           |
| 35  | FPNWTYPVGP  | ×          | ×           |
| 36  | FSHYPQSPSP  | ×          | ×           |
| 37  | FSIFDPSNP   | ×          | ×           |
| 38  | GAGYPPPTMP  | ×          | ×           |
| 39  | GGRFKRPTTP  | ×          | ×           |
| 40  | GGRFNLPHAP  | ×          | ×           |
| 41  | GLPYSHPPQP  | ×          | ×           |
| 42  | GVVMPSPVKP  | ×          | ×           |



|    |             |   |   |
|----|-------------|---|---|
| 43 | ILEYLHPRLP  | × | × |
| 44 | IMQYTGPMPLP | × | × |
| 45 | IMRYLAPEGP  | × | × |
| 46 | ISSFSPPEKP  | × | × |
| 47 | IVQWEEPVEP  | × | × |
| 48 | KCGFPLPGVP  | × | × |
| 49 | KPKFTTPEYP  | × | × |
| 50 | KRMFPLPEVP  | × | × |
| 51 | KSPFGVPGMP  | × | × |
| 52 | KSQFRLPFKP  | × | × |
| 53 | KSQYLQPKQP  | × | × |
| 54 | LAAYAAPGYP  | × | × |
| 55 | LAEYEMPIQP  | × | × |
| 56 | LEDYKKPLPP  | × | × |
| 57 | LEWMQNPEAP  | × | × |
| 58 | LLNYIAPGEP  | × | × |
| 59 | LSPFMIPLFP  | × | × |
| 60 | MARWNQPQPP  | × | √ |
| 61 | MSFWLIPSRP  | × | × |
| 62 | MTEMNPPTQP  | × | × |
| 63 | NARFKRPVLP  | × | × |
| 64 | PDPFKAPSRP  | × | × |
| 65 | PGPYGLPGFP  | × | × |
| 66 | PKKFHVPGLP  | × | × |
| 67 | PLRWGPPEAP  | × | × |
| 68 | PPPWAPPCSP  | × | × |
| 69 | PPWMQPPPPP  | √ | √ |
| 70 | QSIYGSPLSP  | × | × |
| 71 | QSNYSYPQVP  | × | × |
| 72 | RDSYGPEDP   | × | × |
| 73 | RFAFDRPGLP  | × | √ |
| 74 | RPAFGGPAIP  | × | × |
| 75 | RWNFSPPEFP  | × | × |
| 76 | SAPMPEPGAP  | × | × |
| 77 | SEGWIEPSYP  | × | × |
| 78 | SGHYSVPKLP  | × | × |
| 79 | SLNFSSPDPP  | × | × |
| 80 | SMPFAPPTLP  | × | × |
| 81 | SNQFVGPIPP  | × | × |
| 82 | SSLFYSPSSP  | × | × |
| 83 | STKYNGPPFP  | × | × |
| 84 | TALFTHPEGP  | × | × |
| 85 | TFDMNRPLL   | × | × |
| 86 | TNSFYNPNSP  | × | × |

|     |             |   |   |
|-----|-------------|---|---|
| 87  | TPGFQNPQLP  | × | × |
| 88  | TPTWESPARP  | × | × |
| 89  | TRLYYTPEDP  | × | × |
| 90  | TTTFDKPTVP  | × | × |
| 91  | TWEFTQGPLP  | × | × |
| 92  | TWVYYLPLLP  | × | × |
| 93  | VGEWYKPDRP  | × | × |
| 94  | VTAWQQPQPP  | × | × |
| 95  | VVSMTPPHSP  | × | × |
| 96  | WDMVMVGPCKP | × | × |
| 97  | WPMFSAPSSP  | × | × |
| 98  | YGDYTLPDVP  | × | × |
| 99  | YITFIGPSWP  | × | × |
| 100 | YLKYKDPQSP  | × | × |
| 101 | YRMFISPLYP  | × | × |
| 102 | AASLALPPQP  | × | × |
| 103 | AAVEAYPEIP  | × | × |
| 104 | ADIPKSPTKP  | × | × |
| 105 | AFHSITPAPP  | × | × |
| 106 | ALDQSMVPTP  | × | × |
| 107 | ANFGLFPELP  | × | × |
| 108 | ANTGGAPLNP  | × | × |
| 109 | APCIKIPAAP  | × | × |
| 110 | APRQQRPPQP  | × | √ |
| 111 | ATPVSGPTTP  | × | × |
| 112 | AVPLIFPERP  | × | × |
| 113 | CEDLPQPESP  | × | × |
| 114 | CGPKPPPFGP  | × | × |
| 115 | CIVKLVPSKP  | × | × |
| 116 | CMIASPPAP   | × | × |
| 117 | DGLRFVPSLP  | × | × |
| 118 | DRVHSFPTQP  | × | × |
| 119 | DTFGDEPNNP  | × | × |
| 120 | EIGKVPPPIP  | × | × |
| 121 | EPAPRSPVPP  | × | × |
| 122 | EREEGAPETP  | × | × |
| 123 | ESLDDAPVAP  | × | × |
| 124 | EVERNVPDPP  | × | × |
| 125 | FCPCDTPYIP  | × | × |
| 126 | FRGQGCSTP   | × | × |
| 127 | GALCSNPSCP  | × | × |
| 128 | GEEQRPPETP  | × | × |
| 129 | GIAVAQPILP  | × | × |
| 130 | GNMGVVPPGP  | × | × |

|     |             |   |   |
|-----|-------------|---|---|
| 131 | GPSLPGPFSP  | × | × |
| 132 | GPSGGPQPP   | × | × |
| 133 | GPSSLGPSNP  | × | × |
| 134 | HSAGVIPIKP  | × | × |
| 135 | HYGTMDPNIP  | × | × |
| 136 | IIETEPTVP   | × | × |
| 137 | ISCDSSPVLP  | × | × |
| 138 | KARSGPPTIP  | × | × |
| 139 | KERIKQPPSP  | × | × |
| 140 | KGDAGPPGIP  | × | × |
| 141 | KVALGIPNLP  | × | × |
| 142 | LADLGIPVMP  | × | × |
| 143 | LAKQVDPYIP  | × | × |
| 144 | LELQRLPERP  | × | × |
| 145 | LFRISLPVAP  | × | × |
| 146 | LFRLGPPKPP  | × | × |
| 147 | LHLGDLPAEP  | × | × |
| 148 | MVAEEAPPPP  | × | × |
| 149 | NEPPPPPPPP  | × | × |
| 150 | NGVLRPRDP   | × | × |
| 151 | NKCPAGPSGP  | × | × |
| 152 | NMDVTFPSMP  | × | × |
| 153 | PAAHGTPGAP  | × | × |
| 154 | PANGHEYPLNP | × | × |
| 155 | PDGSEIPLPP  | × | × |
| 156 | PDWPLPPDWP  | × | × |
| 157 | PFVHPKPPPP  | × | × |
| 158 | PGTKGFPGSP  | × | × |
| 159 | PKHSPPPPTP  | √ | × |
| 160 | PLRDPHPTPP  | × | × |
| 161 | PPHQAIPLLP  | × | × |
| 162 | PQLPLTPSTP  | × | × |
| 163 | PSRGWAPPGP  | × | √ |
| 164 | PSSLMSPTP   | × | × |
| 165 | QPPPPPPQGP  | × | × |
| 166 | QRLGPGPALP  | × | × |
| 167 | RAALNLPLLP  | × | × |
| 168 | RDFPGPPHAP  | × | × |
| 169 | RKAVYLPGVP  | × | × |
| 170 | RSPTLPLLP   | × | × |
| 171 | RNCLLRPGSP  | × | × |
| 172 | RQLKLSQVVP  | × | × |
| 173 | RQRLITPSPP  | × | × |
| 174 | RTPPSPPGCP  | × | × |

|     |            |   |   |
|-----|------------|---|---|
| 175 | RTPTTPPVFP | × | × |
| 176 | SERRDAPPPP | × | × |
| 177 | SETSPIKTP  | × | × |
| 178 | SHPSAPVLP  | × | × |
| 179 | SIDSGPPPLP | × | × |
| 180 | SKRAFEPRTP | × | × |
| 181 | SMVNSLPTFP | × | × |
| 182 | SQLVEFPLGP | × | × |
| 183 | SRDAASPDKP | × | × |
| 184 | SRHGLSPATP | × | × |
| 185 | SSDSLGPFRP | × | × |
| 186 | SSDSMFPYIP | × | × |
| 187 | SSLILPPKTP | × | × |
| 188 | SSSQLVPWKP | × | × |
| 189 | SSTKSKPGSP | × | × |
| 190 | STDPPKPPLP | × | × |
| 191 | STPCGEPNAP | × | × |
| 192 | SWPDDVPKIP | × | × |
| 193 | TGKKQVPLNP | × | × |
| 194 | TIEVGPSPDP | × | × |
| 195 | TKKRPAPRAP | × | × |
| 196 | TLWKAKPDEP | × | × |
| 197 | TSDGHCPLHP | × | × |
| 198 | TSFKIVPIVP | × | × |
| 199 | TTTTTTPDKP | × | × |
| 200 | VAPSSLPPPP | × | × |
| 201 | VDGDFIPDDP | × | × |
| 202 | VDPKYVPVKP | × | × |
| 203 | VEKVIYPGLP | × | × |
| 204 | VENHPNPAAP | × | × |
| 205 | VEPAAVPGEP | × | × |
| 206 | VEPNTVPHTP | × | × |
| 207 | VHQSTIPSNP | × | × |
| 208 | VSLGWEPVRP | × | × |
| 209 | WPPICDPPQP | × | × |
| 210 | YVRRRRPHKP | × | × |

<sup>a</sup>√: binder; ×: non-binder

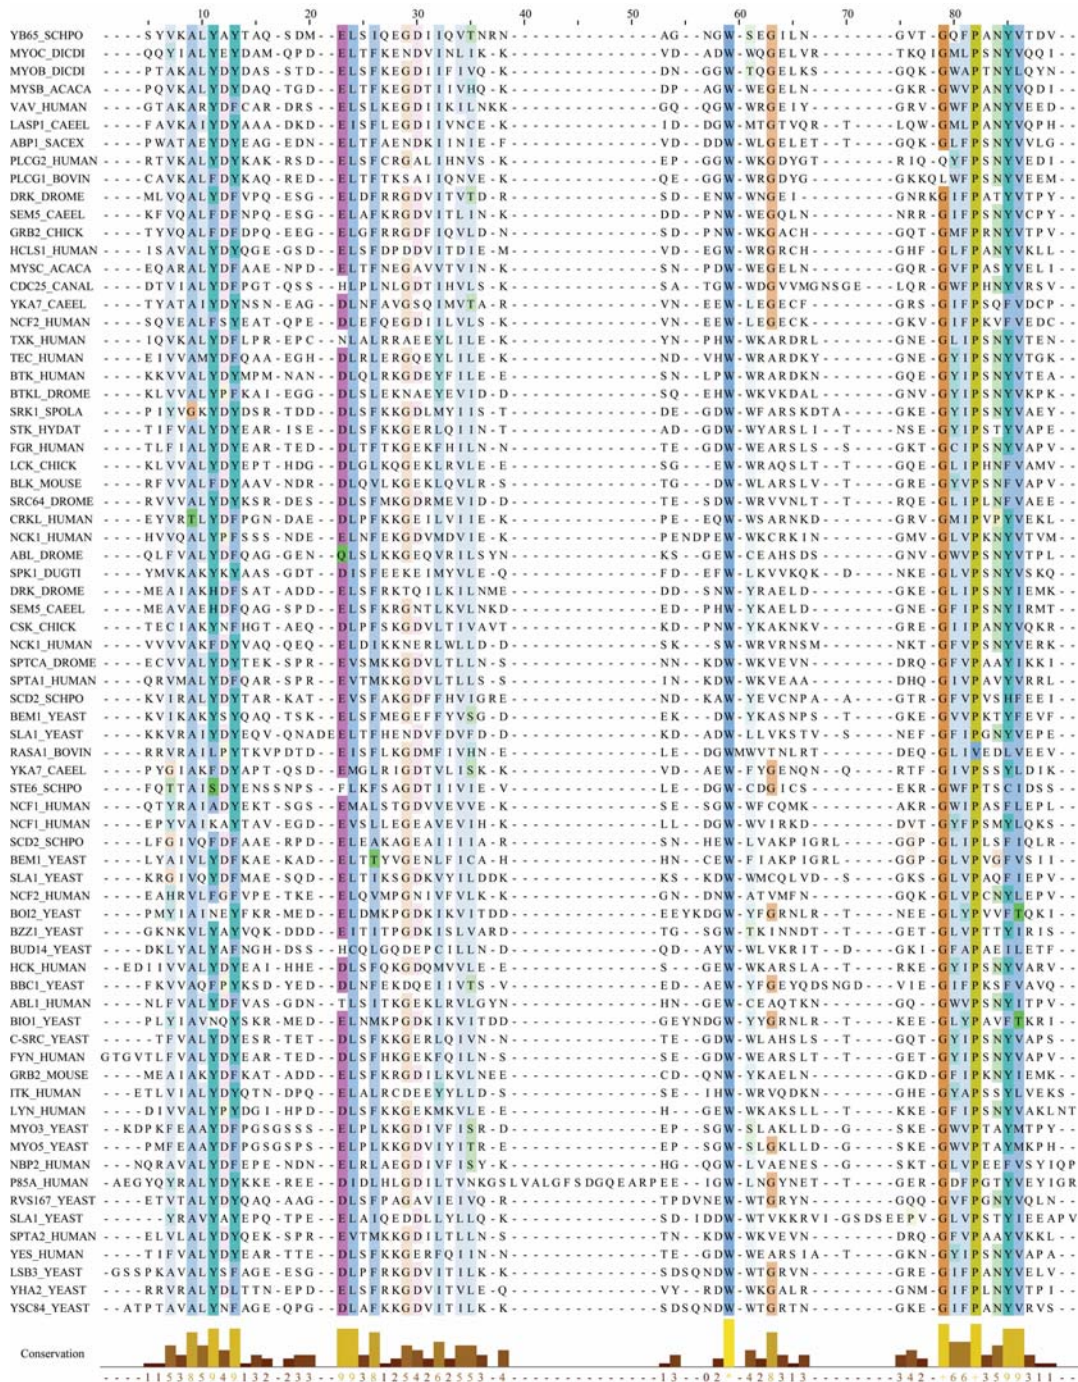

Figure S1. The multiple sequence alignment of the SH3 domains generated using MUSCLE. The sequences of the eighteen SH3 domains studied in this work are shown at the bottom of the multiple sequence alignment. The alignment is colored based on the sequence conservation (conservation larger than 25%) using the ClustalX coloring scheme. The conservation score reflecting the conservation of physico-chemical properties in the alignment is shown at the bottom of the figure. The figure was generated by Jalview.

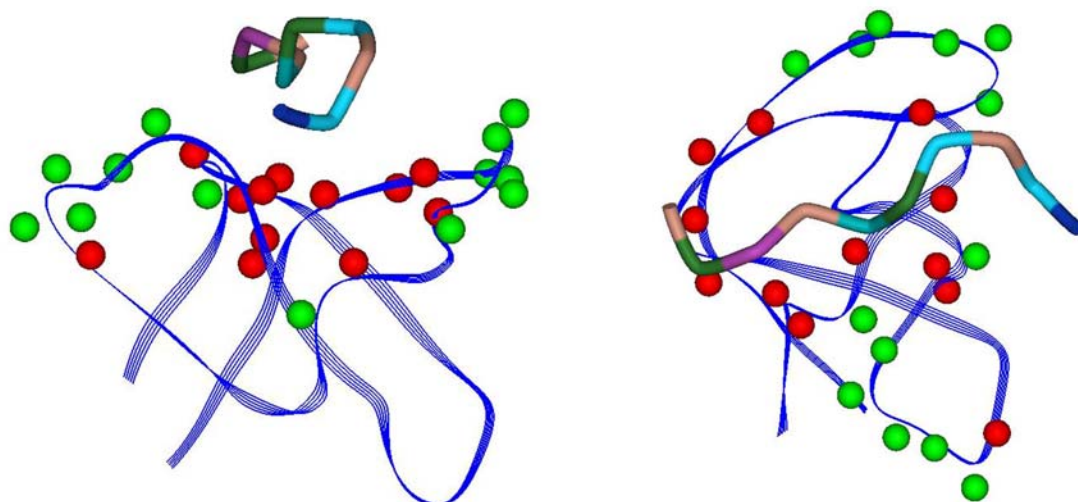

Figure S2. The spatial distributions of residues at the twenty-five important positions of the Bio1 SH3 domains (two different orientations). The SH3 domain is shown using the strand model; the peptide is shown using the stick model; the C $\alpha$  carbons of the important residues are shown using the CPK model. The twelve conserved residues are colored in red and the others in green.

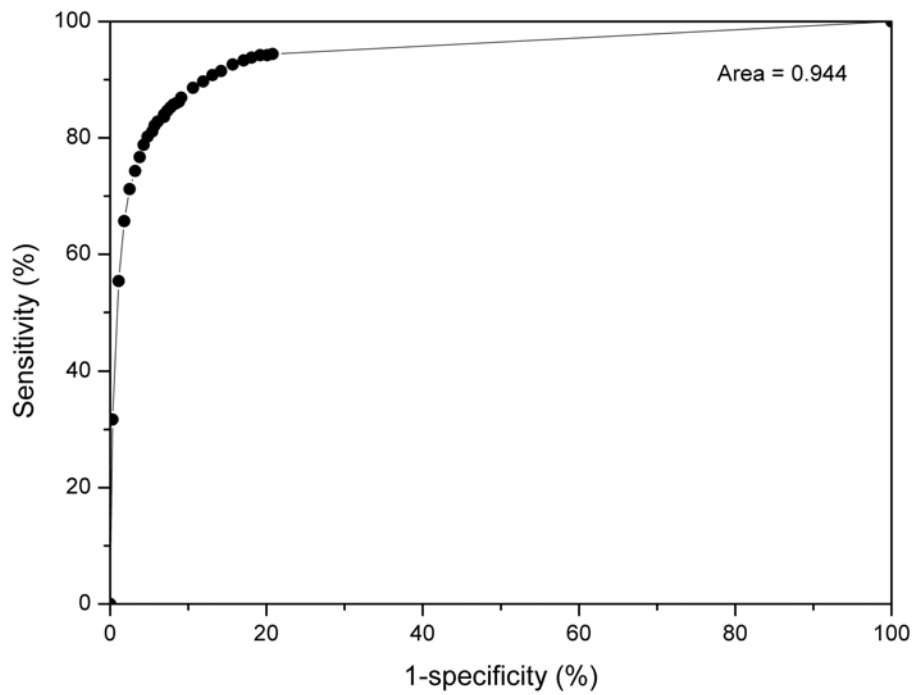

Figure S3. The ROC curve for the unified MIEC-SVM model.

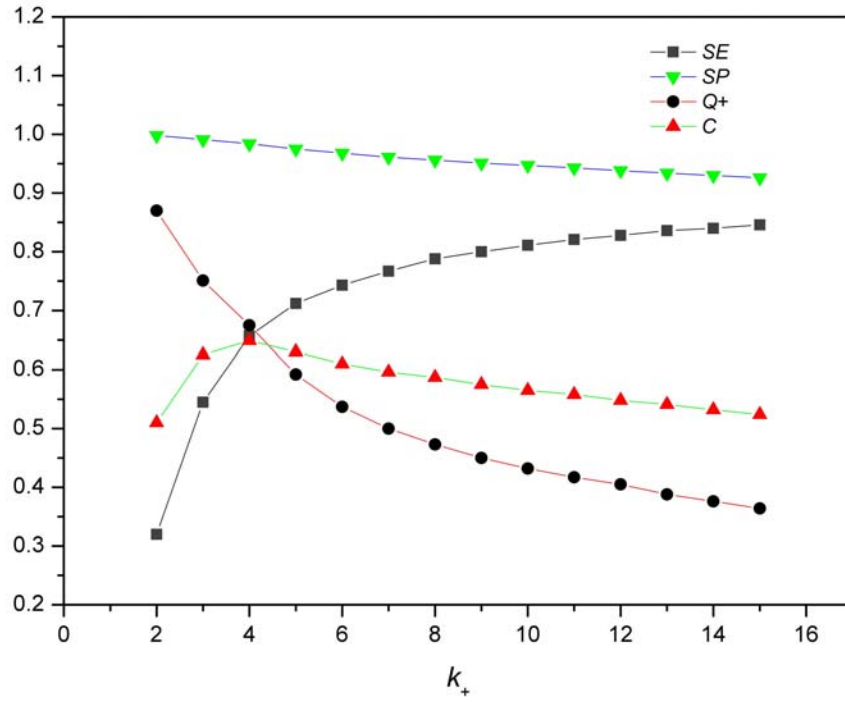

Figure S4. Sensitivity ( $SE$ ), specificity ( $SP$ ), accuracy of the binder class ( $Q_+$ ) and Matthews correlation coefficient ( $C$ ) of the MIEC-SVM versus the weight parameter ( $k_+$ ) for the binder class in cross validations.



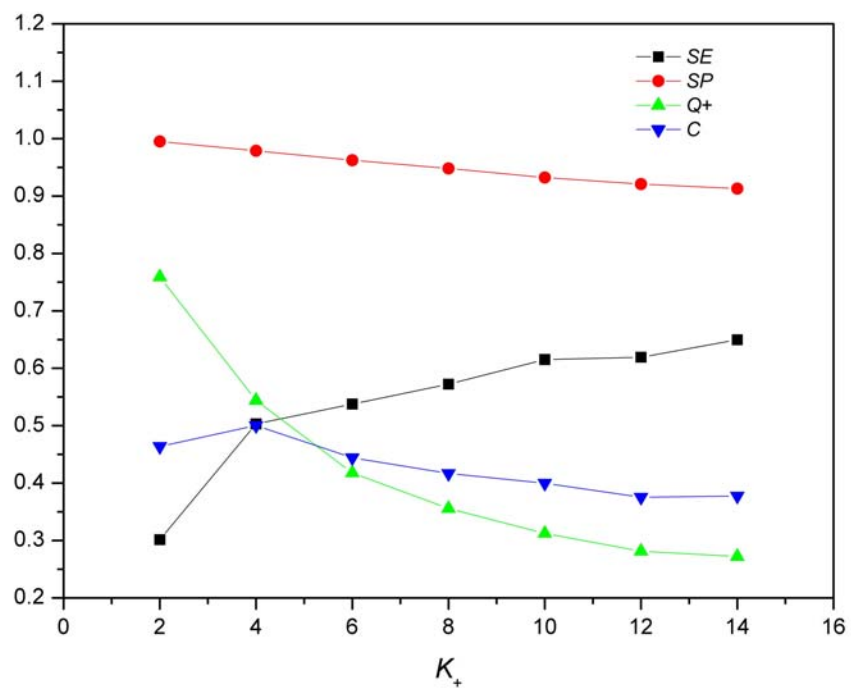

Figure S5. Sensitivity ( $SE$ ), specificity ( $SP$ ), accuracy of the binder class ( $Q_+$ ) and Matthews correlation coefficient ( $C$ ) versus the weight parameter ( $k_+$ ) for the binder class in leave-one-SH3-out cross validations.

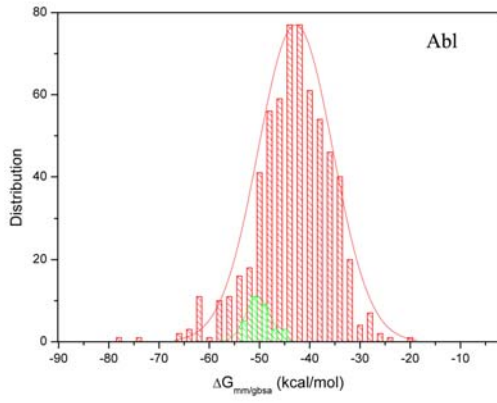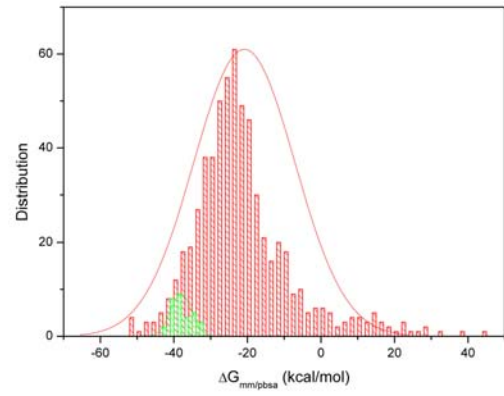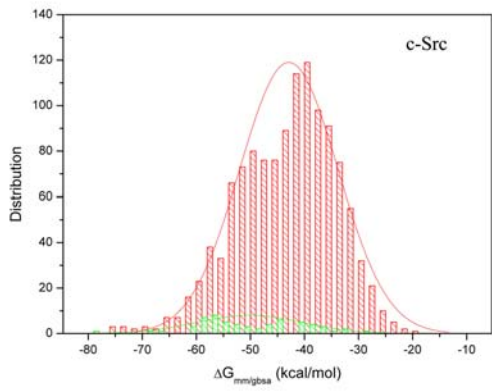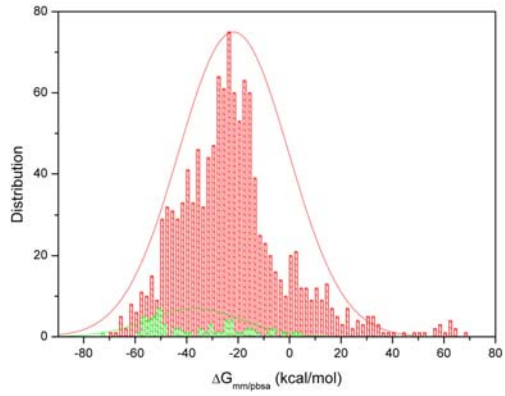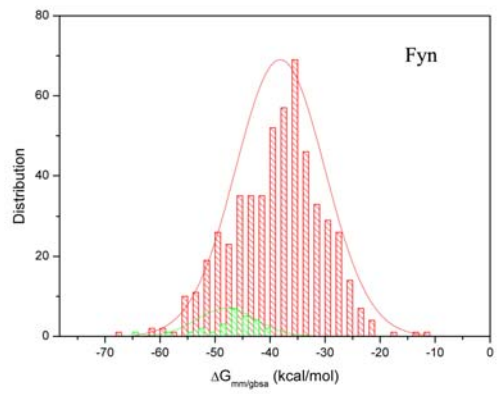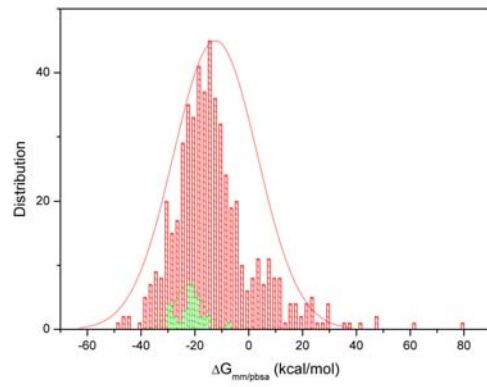

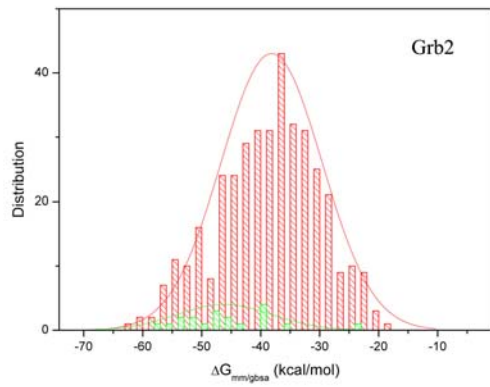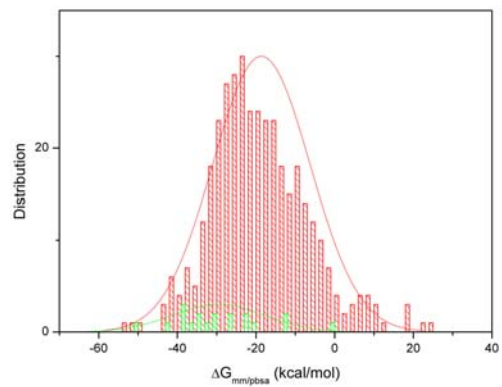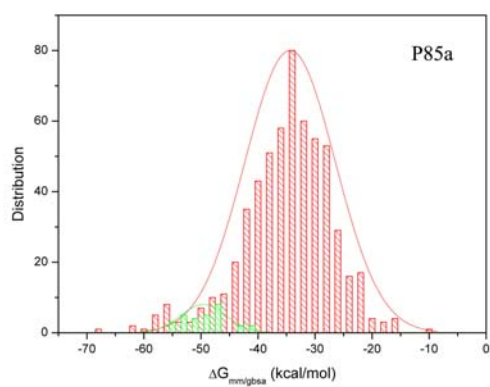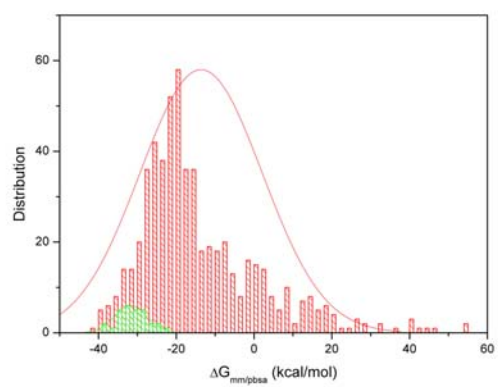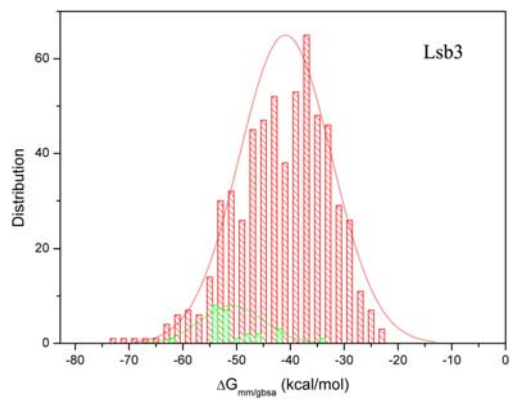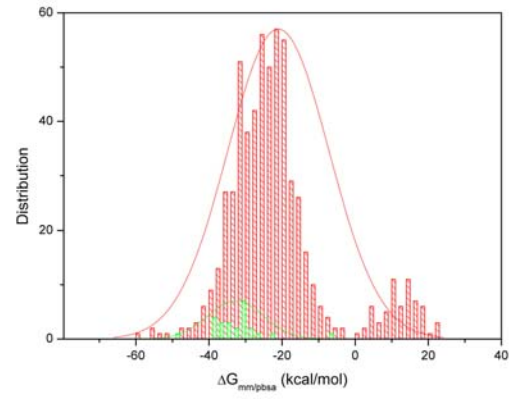

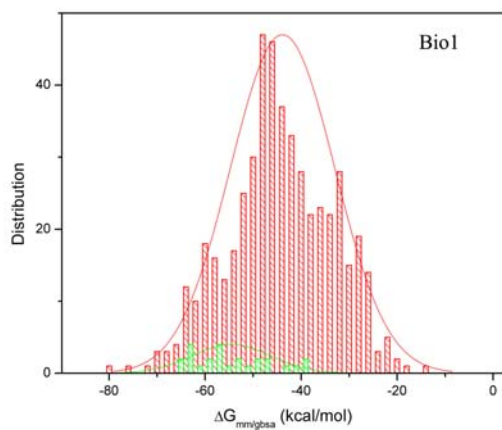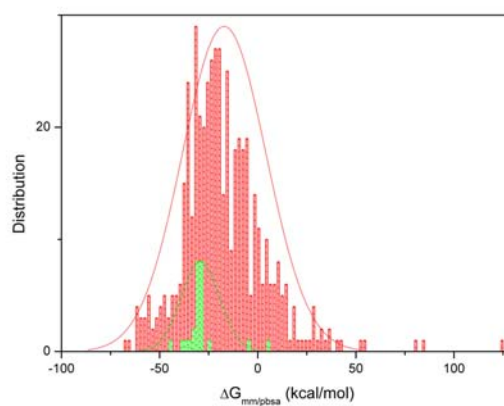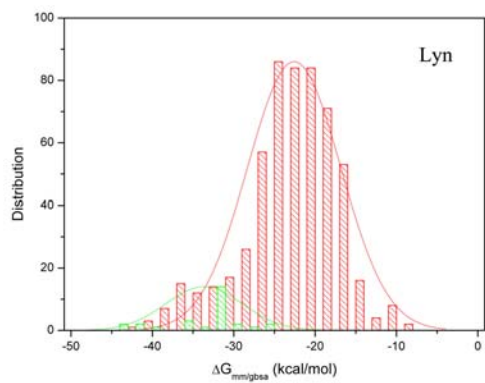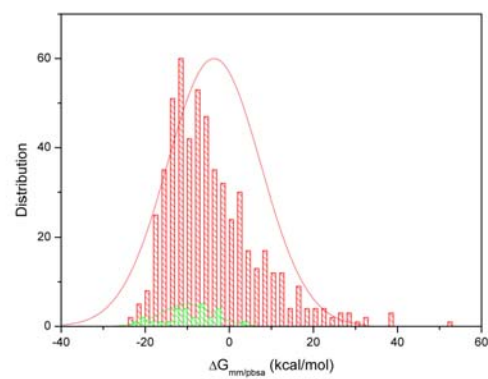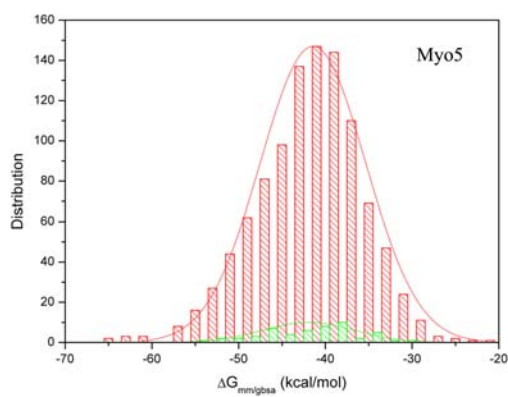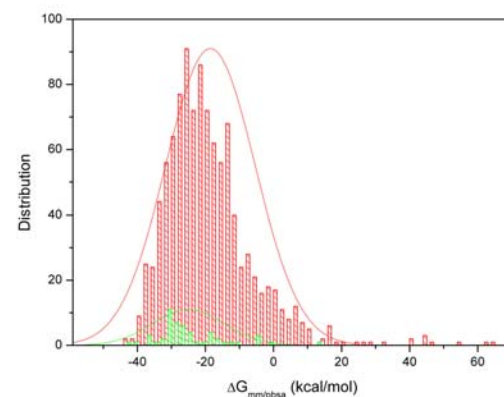

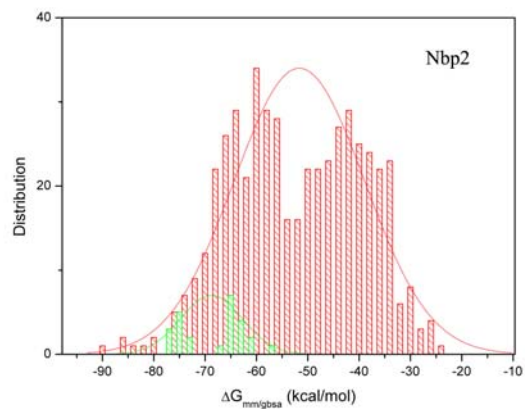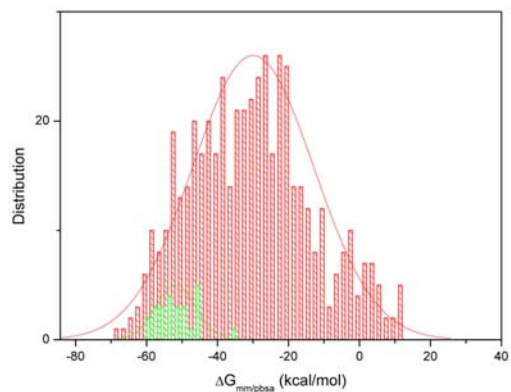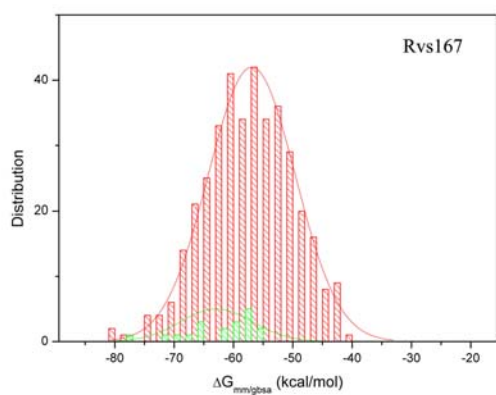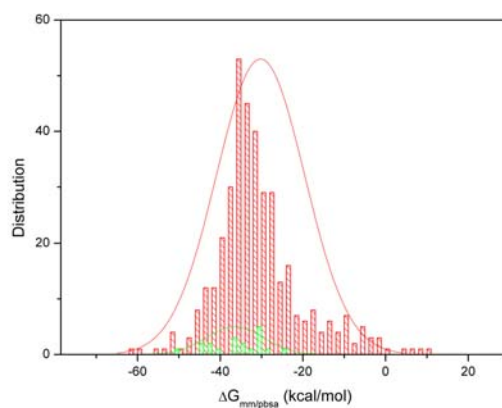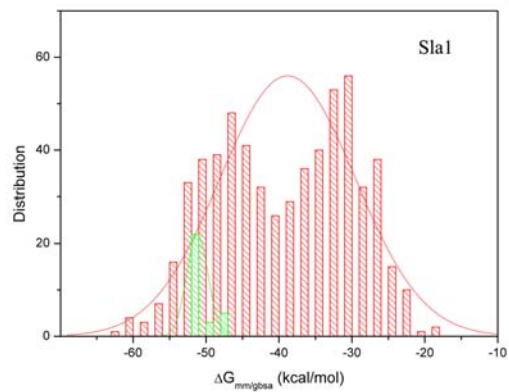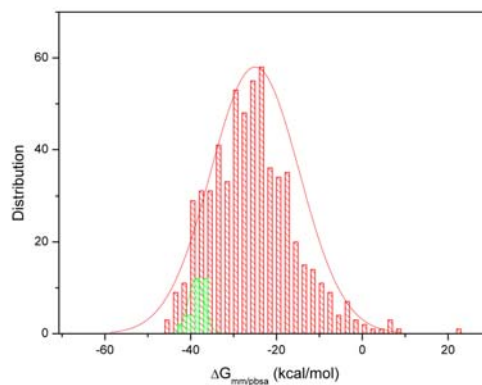

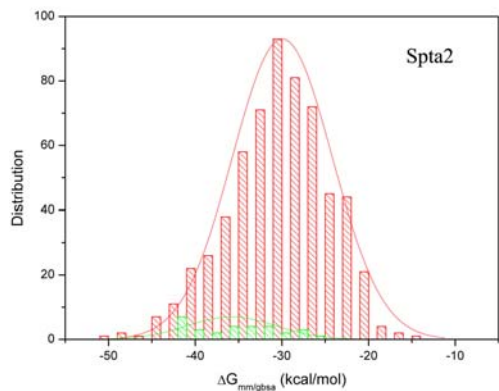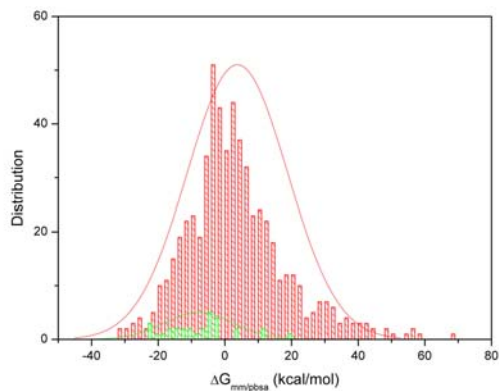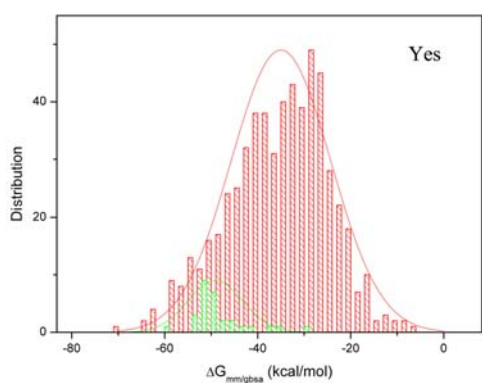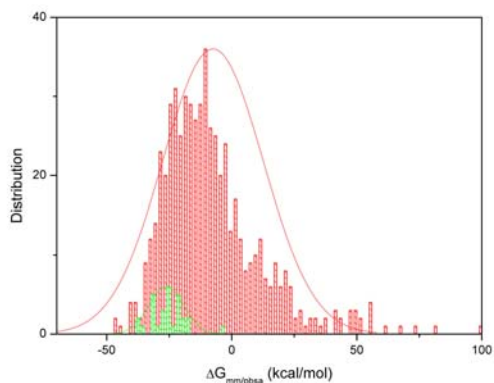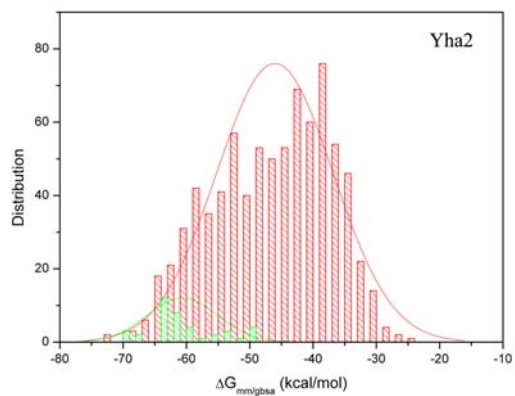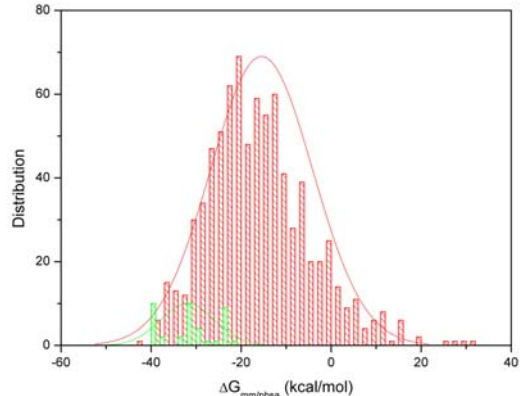

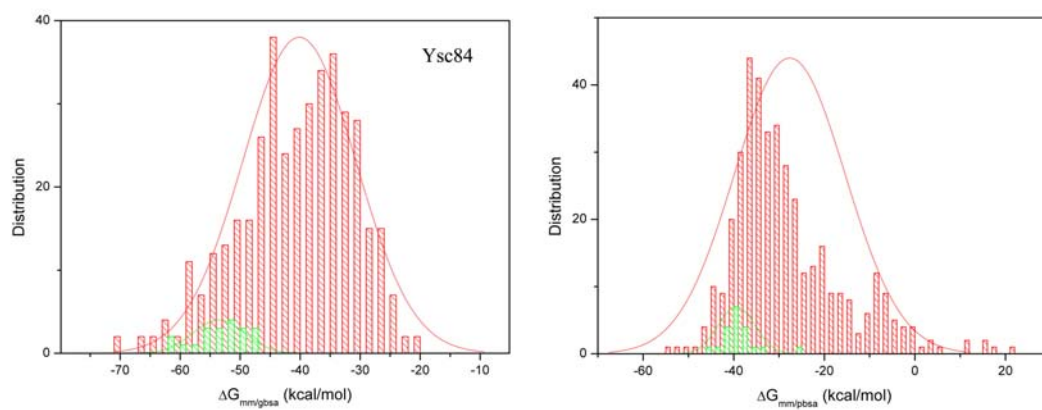

Figure S6. The distributions of the binding free energies of binders and non-binders for the 16 SH3 domains calculated by MM/GBSA (left) and MM/PBSA (right). Red and green bars represent non-binders and binders, respectively.
